# Supplementary material for: Raman scattering spectroscopy of MBE grown thin film topological insulator Bi2−xSbxTe3−ySey
Source: Royal Society of Chemistry journal article supplement (doi:10.1039/d4cp01169d), 2024-01-01
Supplement: d4cp01169d1.pdf [file d4cp01169d1.pdf]

## Supplementary information

### **Raman scattering spectroscopy of MBE grown thin film topological insulator $\text{Bi}_{2-x}\text{Sb}_x\text{Te}_{3-y}\text{Se}_y$**

N. Kumar\*<sup>1,2</sup>, N.V. Surovtsev<sup>3</sup>, P.A. Yunin<sup>4,5</sup>, D.V. Ishchenko<sup>1</sup>, I.A. Milekhin<sup>1,6</sup>, S.P. Lebedev<sup>7</sup>,  
A.A. Lebedev<sup>7</sup>, O.E. Tereshchenko<sup>1,8</sup>

<sup>1</sup>Rzhanov Institute of Semiconductor Physics, SB RAS, Novosibirsk 630090, Russia.

<sup>2</sup>Faculty of Physics, Tomsk State University, 36 Lenin Ave., Tomsk 634050 Russia.

<sup>3</sup>Institute of Automation and Electrometry, SB, RAS, Novosibirsk, 630090, Russia.

<sup>4</sup>Institute for Physics of Microstructures, RAS, Afonino, Nizhny Novgorod 603087, Russia.

<sup>5</sup>Faculty of Radiophysics, Lobachevsky State University, Nizhny Novgorod 603950, Russia.

<sup>6</sup>Novosibirsk State University, Novosibirsk, 630090, Russia.

<sup>7</sup>Ioffe Institute, 194021 St. Petersburg, Russia.

<sup>8</sup>Synchrotron Radiation Facility SKIF, Boreskov Institute of Catalysis, SB, RAS, Koltsovo 630559, Russia.

\*E-mail: [kumar@isp.nsc.ru](mailto:kumar@isp.nsc.ru)

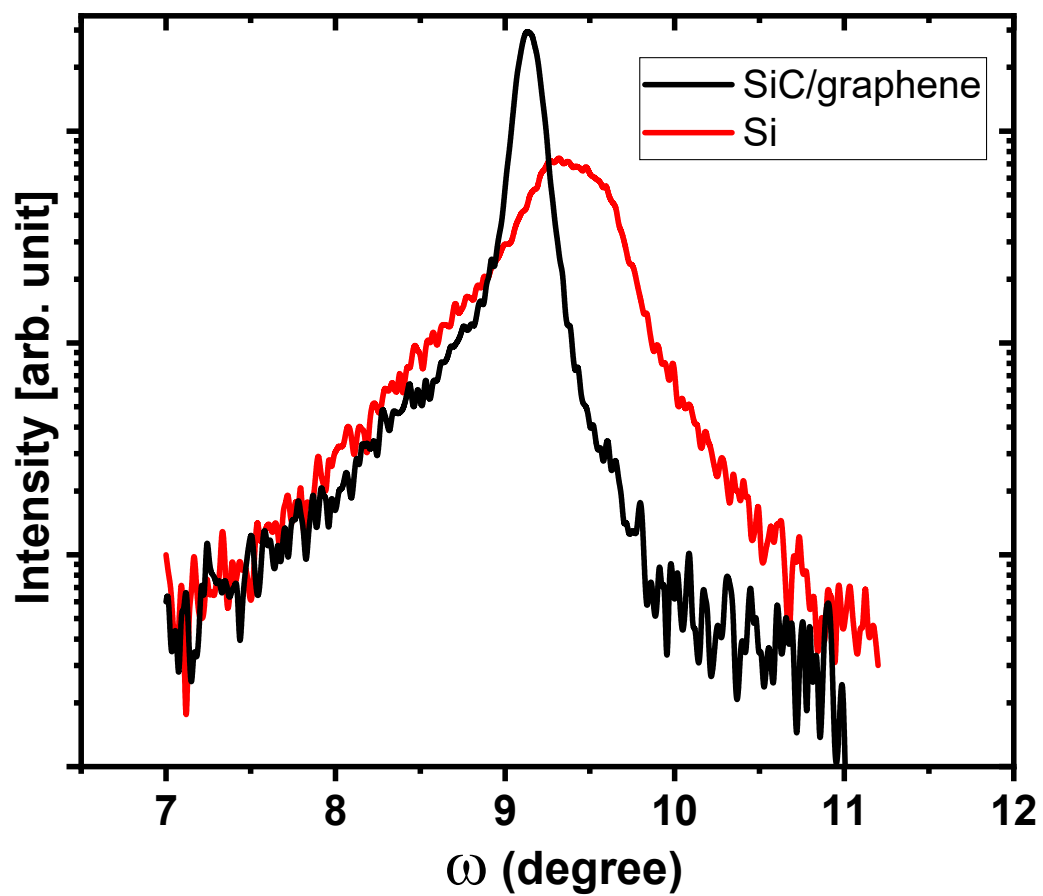

**Fig. 1-SI.** X-ray rocking curve of BSTS films grown on the Si (111) and SiC/graphene substrates.

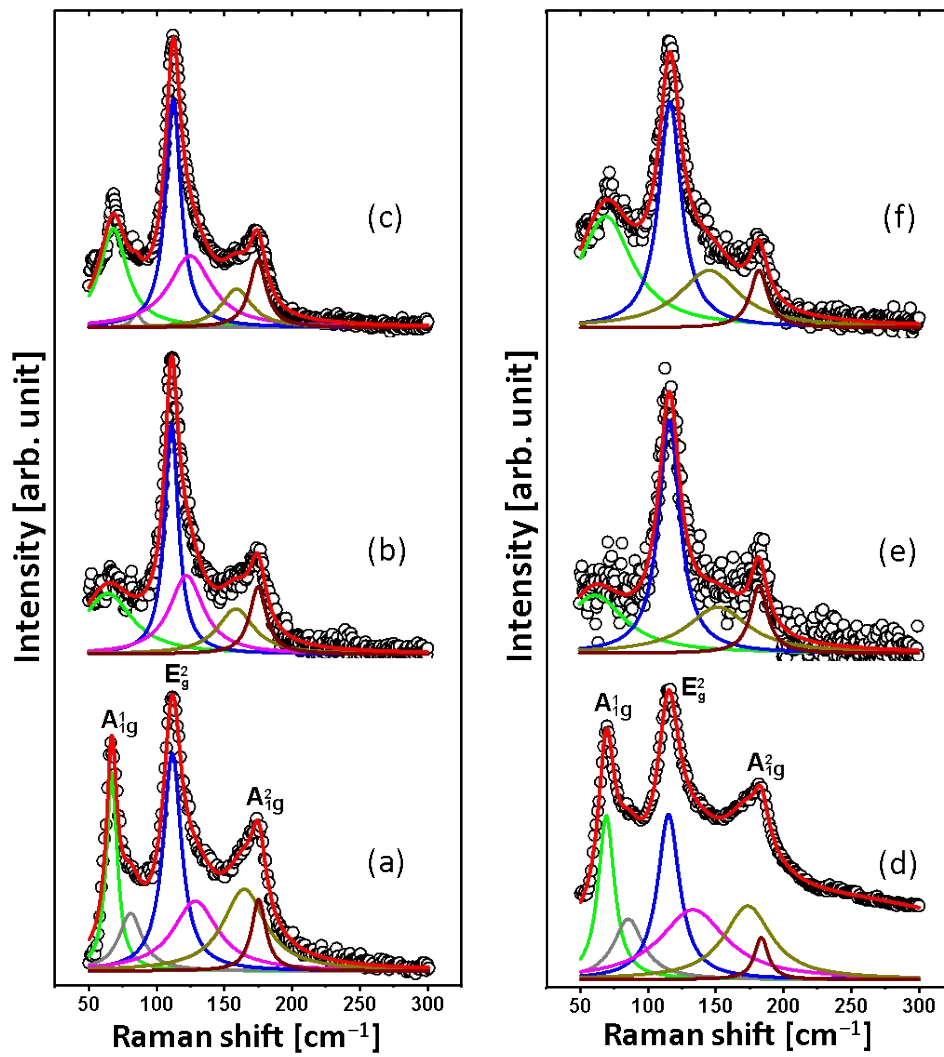

**Fig. 2-SI.** Photon energy dependent unpolarized Raman spectroscopy of BSTS film grown on the Si substrates ( curves a, b and c) and SiC/graphene substrate (curves d, e, and f); three different laser excitations (a and d) 532 nm (b and e) 638 nm and (c and f) 785 nm.
